# Supplementary material for: Validation and Psychometric Analysis of the German Translation of the Appraisal of Self-Care Agency Scale-Revised
Source: MDPI journal article supplement (doi:10.3390/healthcare10091785), 2022-09-16

***Supplementary Materials for: The German version of the Appraisal of Self-Care Agency Scale-Revised (ASAS-R)***

|                                                                                                                     |   |
|---------------------------------------------------------------------------------------------------------------------|---|
| <b>Supplement Table S1.</b> Translated questionnaire                                                                | 2 |
| <b>Supplement Table S2:</b> Overview of Diagnoses                                                                   | 3 |
| <b>Supplement Table S3.</b> Confirmatory Factor Analysis of original factor structure                               | 3 |
| <b>Supplement Table S4.</b> Principal Component Analysis                                                            | 4 |
| <b>Supplement Table S5.</b> Item-total correlation for all three factors                                            | 5 |
| <b>Supplement Figure S1.</b> Correlation Matrix for all ASAS items                                                  | 6 |
| <b>Supplement Figure S2.</b> CFA Model Plot                                                                         | 7 |
| <b>Supplement Figure S3.</b> Comparison of item attribution to the three factors in original and translated version | 7 |
| <b>Supplement Figure S4.</b> Correlation of ASAS and PAM items                                                      | 8 |

**Supplement Table S1.** Translated questionnaire.

| <p>Im folgenden Abschnitt möchten wir von Ihnen gerne erfahren, wie Sie mit Ihrer Erkrankung umgehen und wie sicher Sie sich dabei fühlen.</p> <p>Bitte kreuzen Sie für jede der folgenden Aussagen ein Kästchen an, das für Sie persönlich am besten beschreibt, wie sehr Sie der Aussage zustimmen oder nicht zustimmen. Es gibt keine richtigen oder falschen Antworten. Ihre Antworten sollten Ihre persönliche Meinung widerspiegeln, unabhängig davon, was Ihr Arzt gerne von Ihnen hören würde.</p> |                                 |                          |                          |                          |                               |
|------------------------------------------------------------------------------------------------------------------------------------------------------------------------------------------------------------------------------------------------------------------------------------------------------------------------------------------------------------------------------------------------------------------------------------------------------------------------------------------------------------|---------------------------------|--------------------------|--------------------------|--------------------------|-------------------------------|
|                                                                                                                                                                                                                                                                                                                                                                                                                                                                                                            | stimme<br>überhaupt<br>nicht zu | stimme<br>nicht zu       | Weder<br>noch            | stimme<br>zu             | stimme<br>voll und<br>ganz zu |
| 1. Wenn sich die Umstände verändern, führe ich nötige Maßnahmen durch, um gesund zu bleiben                                                                                                                                                                                                                                                                                                                                                                                                                | <input type="checkbox"/>        | <input type="checkbox"/> | <input type="checkbox"/> | <input type="checkbox"/> | <input type="checkbox"/>      |
| 2. Wenn sich meine Beweglichkeit verschlechtert, führe ich entsprechende Anpassungen durch                                                                                                                                                                                                                                                                                                                                                                                                                 | <input type="checkbox"/>        | <input type="checkbox"/> | <input type="checkbox"/> | <input type="checkbox"/> | <input type="checkbox"/>      |
| 3. Wenn nötig, setze ich neue Prioritäten bei den Maßnahmen, die ich für meine Gesundheit ergreife                                                                                                                                                                                                                                                                                                                                                                                                         | <input type="checkbox"/>        | <input type="checkbox"/> | <input type="checkbox"/> | <input type="checkbox"/> | <input type="checkbox"/>      |
| 4. Mir fehlt oft die Energie, um mich so um mich selbst zu kümmern, wie ich sollte                                                                                                                                                                                                                                                                                                                                                                                                                         | <input type="checkbox"/>        | <input type="checkbox"/> | <input type="checkbox"/> | <input type="checkbox"/> | <input type="checkbox"/>      |
| 5. Ich suche nach neuen Möglichkeiten, mich besser um mich selbst zu kümmern                                                                                                                                                                                                                                                                                                                                                                                                                               | <input type="checkbox"/>        | <input type="checkbox"/> | <input type="checkbox"/> | <input type="checkbox"/> | <input type="checkbox"/>      |
| 6. Wenn ich es brauche, schaffe ich es, mir Zeit für mich selbst zu nehmen                                                                                                                                                                                                                                                                                                                                                                                                                                 | <input type="checkbox"/>        | <input type="checkbox"/> | <input type="checkbox"/> | <input type="checkbox"/> | <input type="checkbox"/>      |
| 7. Wenn ich neue Medikamente einnehme, suche ich Informationen über mögliche Nebenwirkungen heraus, um mich besser um mich selbst kümmern zu können                                                                                                                                                                                                                                                                                                                                                        | <input type="checkbox"/>        | <input type="checkbox"/> | <input type="checkbox"/> | <input type="checkbox"/> | <input type="checkbox"/>      |
| 8. In der Vergangenheit habe ich meine alten Gewohnheiten verändert, um meine Gesundheit zu verbessern                                                                                                                                                                                                                                                                                                                                                                                                     | <input type="checkbox"/>        | <input type="checkbox"/> | <input type="checkbox"/> | <input type="checkbox"/> | <input type="checkbox"/>      |
| 9. Ich führe regelmäßig Maßnahmen durch, um die Sicherheit von mir selbst und meiner Familie zu gewährleisten                                                                                                                                                                                                                                                                                                                                                                                              | <input type="checkbox"/>        | <input type="checkbox"/> | <input type="checkbox"/> | <input type="checkbox"/> | <input type="checkbox"/>      |
| 10. Ich überprüfe regelmäßig die Wirksamkeit von den Maßnahmen, die ich für eine bessere Gesundheit durchführe                                                                                                                                                                                                                                                                                                                                                                                             | <input type="checkbox"/>        | <input type="checkbox"/> | <input type="checkbox"/> | <input type="checkbox"/> | <input type="checkbox"/>      |
| 11. Bei meinen täglichen Aktivitäten nehme ich mir selten Zeit, mich um mich selbst zu kümmern                                                                                                                                                                                                                                                                                                                                                                                                             | <input type="checkbox"/>        | <input type="checkbox"/> | <input type="checkbox"/> | <input type="checkbox"/> | <input type="checkbox"/>      |
| 12. Ich bin in der Lage, mir selbst Informationen zu beschaffen, wenn meine Gesundheit bedroht ist                                                                                                                                                                                                                                                                                                                                                                                                         | <input type="checkbox"/>        | <input type="checkbox"/> | <input type="checkbox"/> | <input type="checkbox"/> | <input type="checkbox"/>      |
| 13. Wenn ich mich nicht um mich selbst kümmern kann, suche ich mir Hilfe                                                                                                                                                                                                                                                                                                                                                                                                                                   | <input type="checkbox"/>        | <input type="checkbox"/> | <input type="checkbox"/> | <input type="checkbox"/> | <input type="checkbox"/>      |
| 14. Ich habe selten Zeit für mich selbst                                                                                                                                                                                                                                                                                                                                                                                                                                                                   | <input type="checkbox"/>        | <input type="checkbox"/> | <input type="checkbox"/> | <input type="checkbox"/> | <input type="checkbox"/>      |
| 15. Ich kann mich nicht immer so um mich kümmern, wie ich es gerne tun würde                                                                                                                                                                                                                                                                                                                                                                                                                               | <input type="checkbox"/>        | <input type="checkbox"/> | <input type="checkbox"/> | <input type="checkbox"/> | <input type="checkbox"/>      |

Sousa, V. D., Zauszniewski, J. A., Bergquist-Beringer, S., Musil, C. M., Neese, J. B., & Jaber, A. F. (2010). Reliability, validity and factor structure of the Appraisal of Self-Care Agency Scale-Revised (ASAS-R). *Journal of evaluation in clinical practice*, 16(6), 1031–1040. <https://doi.org/10.1111/j.1365-2753.2009.01242.x>

**Supplement Table S2:** Overview of Diagnoses.

| <b>Diagnosis</b>                          | <b>Count</b> |
|-------------------------------------------|--------------|
| Hypertension                              | 75           |
| Other/Miscellaneous                       | 65           |
| COPD                                      | 38           |
| Diabetes                                  | 34           |
| Mental Illness                            | 29           |
| Arthritis                                 | 23           |
| Rheumatic Illness                         | 22           |
| High Cholesterol                          | 21           |
| Heart Attack                              | 17           |
| Thyroid Problems                          | 17           |
| Cancer                                    | 14           |
| Osteoporosis                              | 13           |
| Parkinson's Disease                       | 12           |
| Migraines                                 | 11           |
| Chronic Kidney Disease                    | 8            |
| Multiple Sclerosis                        | 7            |
| Stroke/other form of circulatory disorder | 7            |
| Fractures                                 | 6            |
| Long COVID                                | 5            |
| Cataracts                                 | 2            |

**Supplement Table S3.** Confirmatory Factor Analysis of original factor structure.

| <b>Model</b> | <b><math>X^2</math></b> | <b>Df</b>  |              | <b><math>p</math></b> |                       |  |
|--------------|-------------------------|------------|--------------|-----------------------|-----------------------|--|
| Baseline     | 1170.64                 | 105        |              |                       |                       |  |
| Factor Model | 302.689                 | 87         |              | <.001                 |                       |  |
| <b>CFI</b>   | <b>TLI</b>              | <b>AIC</b> | <b>RMSEA</b> | <b>95 % CI</b>        | <b><math>p</math></b> |  |
| .798         | .756                    | 8420.25    | .107         | .094, .121            | < .001                |  |

**Supplement Table S4.** Principal Component Analysis.

| Chi² Test                 |                    |                     |                  |                     |
|---------------------------|--------------------|---------------------|------------------|---------------------|
|                           | Value              | Df                  | p                |                     |
|                           | 191.652            | 63                  | < .001           |                     |
| Component Loadings        |                    |                     |                  |                     |
| Variable                  | Component 1        | Component 2         | Component 3      | Uniqueness          |
| ASAS14                    |                    |                     | 0.886            | 0.226               |
| ASAS15                    |                    |                     | 0.779            | 0.314               |
| ASAS11                    |                    |                     | 0.727            | 0.459               |
| ASAS6                     |                    |                     | 0.654            | 0.464               |
| ASAS4                     |                    |                     | 0.488            | 0.516               |
| ASAS3                     | 0.849              |                     |                  | 0.281               |
| ASAS2                     | 0.776              |                     |                  | 0.282               |
| ASAS1                     | 0.723              |                     |                  | 0.391               |
| ASAS12                    | 0.620              |                     |                  | 0.644               |
| ASAS8                     | 0.461              |                     |                  | 0.597               |
| ASAS9                     |                    | 0.783               |                  | 0.387               |
| ASAS10                    |                    | 0.750               |                  | 0.317               |
| ASAS7                     |                    | 0.565               |                  | 0.622               |
| ASAS5                     |                    | 0.463               |                  | 0.575               |
| ASAS13                    |                    |                     |                  | 0.767               |
| Component Characteristics |                    |                     |                  |                     |
|                           | Unrotated Solution |                     | Rotated Solution |                     |
| Component                 | Eigenvalue         | Cumulative Variance | Sumsq. Loadings  | Cumulative Variance |
| 1                         | 4.664              | 0.311               | 2.903            | 0.194               |
| 2                         | 2.399              | 0.471               | 3.010            | 0.394               |
| 3                         | 1.096              | 0.544               | 2.247            | 0.544               |

**Supplement Table S5.** Item-total correlation for all three factors.

| Factor | Item | r*  | cor. r* | Mean (SD) | Inter-item-corr |
|--------|------|-----|---------|-----------|-----------------|
| 1      | 1    | .59 | .69     | 4.2 (.85) | .38             |
|        | 2    | .72 | .83     | 4.0 (.83) |                 |
|        | 3    | .70 | .80     | 4.1 (.76) |                 |
|        | 8    | .44 | .50     | 3.7 (1.0) |                 |
|        | 12   | .37 | .42     | 4.1 (.89) |                 |
| 2      | 5    | .41 | .49     | 3.8 (.98) | .35             |
|        | 7    | .35 | .42     | 3.4 (1.3) |                 |
|        | 9    | .49 | .66     | 3.7 (.91) |                 |
|        | 10   | .61 | .77     | 3.6 (.88) |                 |
| 3      | 4    | .48 | .54     | 2.6 (1.3) | .44             |
|        | 6    | .55 | .61     | 3.5 (1.1) |                 |
|        | 11   | .50 | .56     | 2.7 (1.1) |                 |
|        | 14   | .73 | .83     | 3.0 (1.3) |                 |
|        | 15   | .70 | .79     | 2.5 (1.3) |                 |

**Supplement Figure S1.** Correlation Matrix for all ASAS items.

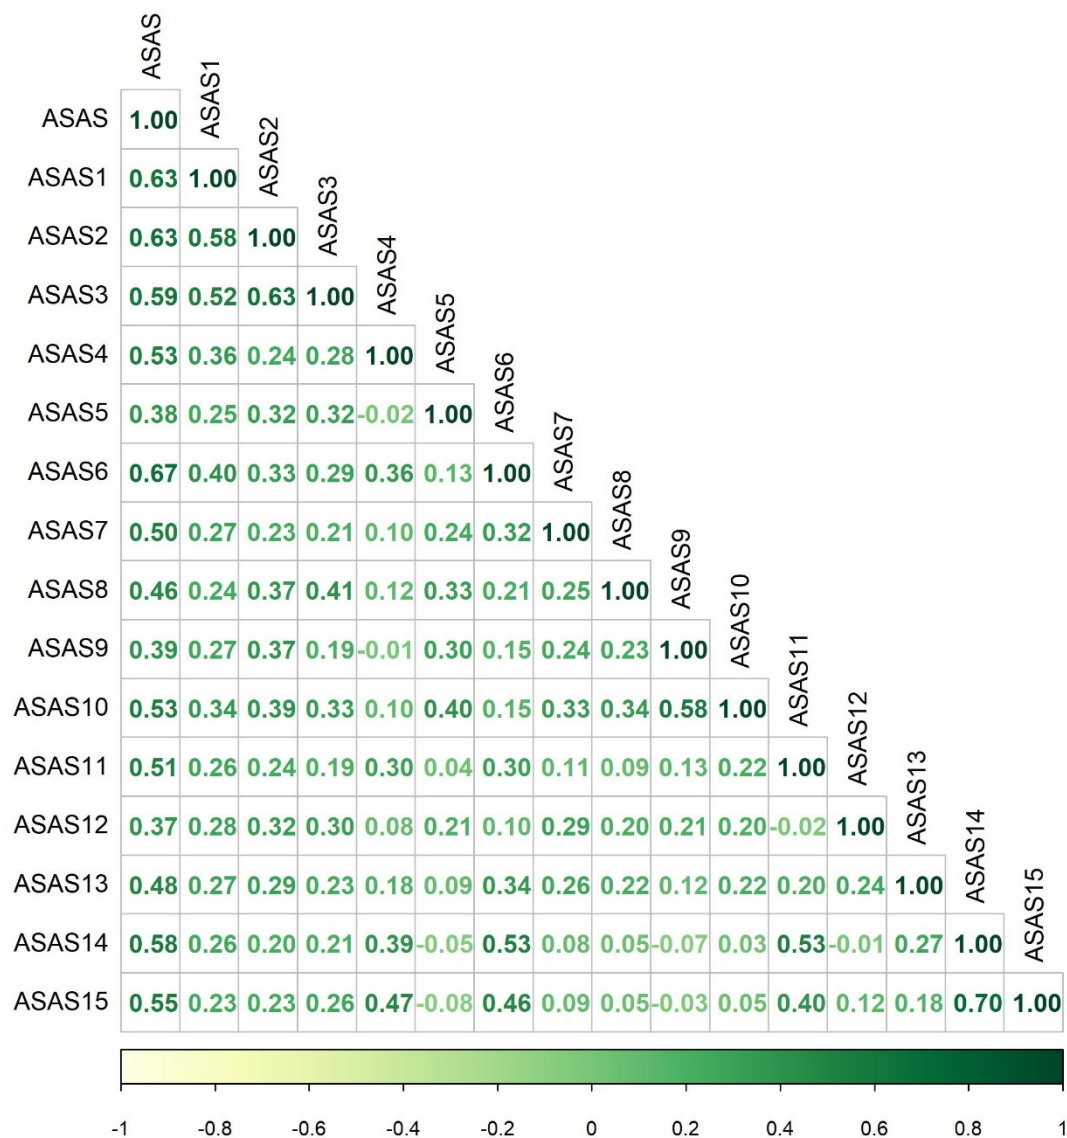

**Supplement Figure S2.** CFA Model Plot.

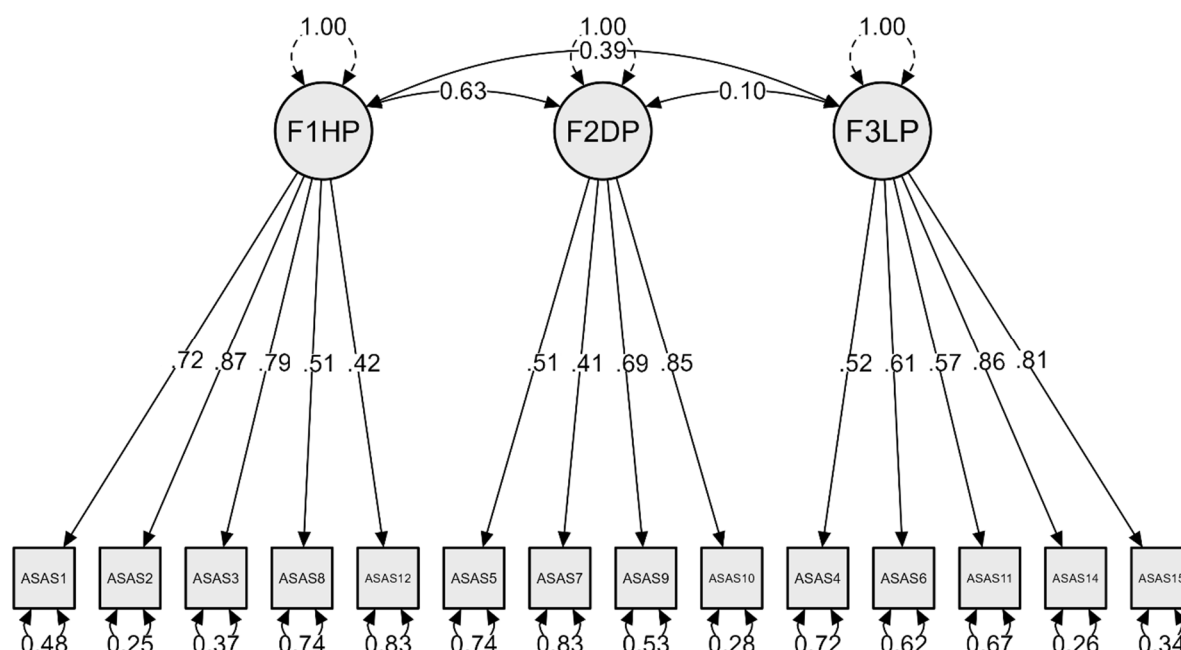

Note: F1HP = Factor 1 Having Power for Self-Care, F2DP = Factor 2, Developing Power for Self-Care, F3LP = Factor 3 Lacking Power for Self-Care

**Supplement Figure S3.** Comparison of item attribution to the three factors in original and translated version.

| Original                                                                                                                                                                                                                                                                                                                                                                                                                                                                        | Translation                                                                                                                                                                                                                                                                                                                                                                                                                               |
|---------------------------------------------------------------------------------------------------------------------------------------------------------------------------------------------------------------------------------------------------------------------------------------------------------------------------------------------------------------------------------------------------------------------------------------------------------------------------------|-------------------------------------------------------------------------------------------------------------------------------------------------------------------------------------------------------------------------------------------------------------------------------------------------------------------------------------------------------------------------------------------------------------------------------------------|
| <b>Factor 1: Having Power for Self-Care</b><br>1. As circumstances change, I make the needed adjustments to stay healthy<br>2. If my mobility is decreased, I make the needed adjustments<br>3. When needed, I set new priorities in the measures that I take to stay healthy<br>5. I look for better ways to take care of myself<br>6. When needed, I manage to take time to care for myself<br>10. I regularly evaluate the effectiveness of things that I do to stay healthy | <b>Factor 1: Having Power for Self-Care</b><br>1. As circumstances change, I make the needed adjustments to stay healthy<br>2. If my mobility is decreased, I make the needed adjustments<br>3. When needed, I set new priorities in the measures that I take to stay healthy<br>8. In the past, I have changed some of my old habits in order to improve my health<br>12. I am able to get information I need, when health is threatened |
| <b>Factor 2: Developing Power for Self-Care</b><br>7. If I take a new medication, I obtain information about the side effects to better care for myself<br>8. In the past, I have changed some of my old habits in order to improve my health<br>9. I routinely take measures to insure the safety of myself and my family<br>12. I am able to get information I need, when health is threatened<br>13. I seek help when unable to care for myself                              | <b>Factor 2: Developing Power for Self-Care</b><br>5. I look for better ways to take care of myself<br>7. If I take a new medication, I obtain information about the side effects to better care for myself<br>9. I routinely take measures to insure the safety of myself and my family<br>10. I regularly evaluate the effectiveness of things that I do to stay healthy                                                                |
| <b>Factor 3: Lacking Power for Self-Care</b><br>4. I often lack energy to care for myself in the way that I know I should<br>11. In my daily activities I seldom take time to care for myself<br>14. I seldom have time for myself<br>15. I am not always able to care for myself in a way I would like                                                                                                                                                                         | <b>Factor 3: Lacking Power for Self-Care</b><br>4. I often lack energy to care for myself in the way that I know I should<br>6. When needed, I manage to take time to care for myself<br>11. In my daily activities I seldom take time to care for myself<br>14. I seldom have time for myself<br>15. I am not always able to care for myself in a way I would like<br>Unclassified: 13. I seek help when unable to care for myself       |

**Supplement Figure S4.** Correlation of ASAS and PAM items.

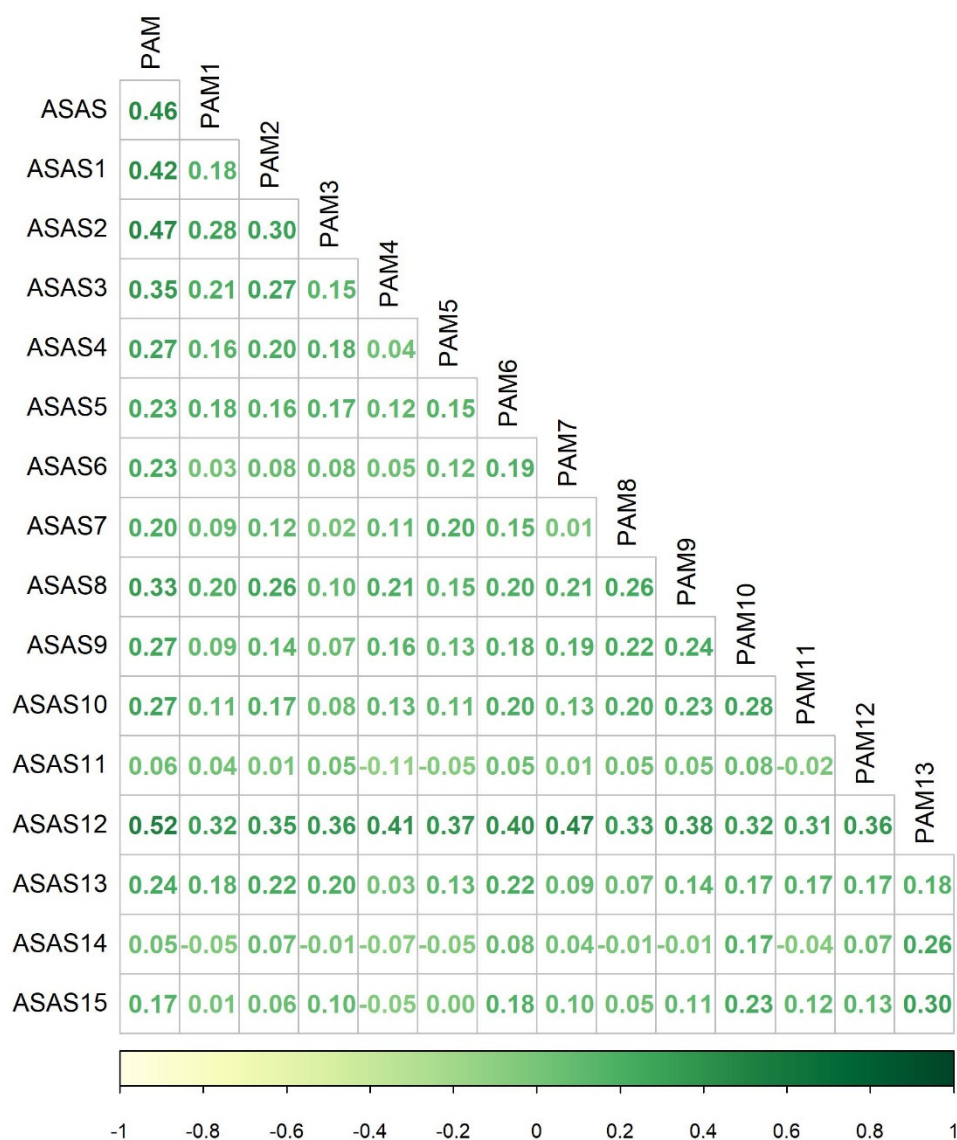

Supplement: s1 [file s1]
